# Supplementary material for: Sustainable food security in India—Domestic production and macronutrient availability
Source: PubMed Central journal article supplement (PMC5865708; doi:10.1371/journal.pone.0193766), 2018-03-23
Supplement: pone.0193766.s002.pdf [file pone.0193766.s002.pdf]

|                       | <b>Agricultural<br/>production</b> | <b>Postharvest<br/>handling and<br/>storage</b> | <b>Processing and<br/>packaging</b> | <b>Distribution</b> | <b>Consumption</b> |
|-----------------------|------------------------------------|-------------------------------------------------|-------------------------------------|---------------------|--------------------|
| Cereals               | 6%                                 | 7%                                              | 3.5%                                | 2%                  | 3%                 |
| Roots and tubers      | 6%                                 | 19%                                             | 10%                                 | 11%                 | 3%                 |
| Oilseeds and pulses   | 7%                                 | 12%                                             | 8%                                  | 2%                  | 1%                 |
| Fruits and vegetables | 15%                                | 9%                                              | 25%                                 | 10%                 | 7%                 |
| Meat                  | 5.1%                               | 0.3%                                            | 5%                                  | 7%                  | 4%                 |
| Fish and seafood      | 8.2%                               | 6%                                              | 9%                                  | 15%                 | 2%                 |
| Milk                  | 3.5%                               | 6%                                              | 2%                                  | 10%                 | 1%                 |
