# Supplementary material for: Sustainable food security in India—Domestic production and macronutrient availability
Source: PubMed Central journal article supplement (PMC5865708; doi:10.1371/journal.pone.0193766), 2018-03-23
Supplement: pone.0193766.s003.pdf [file pone.0193766.s003.pdf]

| Scenario                                                | Assumptions                                                                                                                                                                                                                                                                                                                                                                                                                                                                                                                                                                                                                                                                                                                                                                                                                |
|---------------------------------------------------------|----------------------------------------------------------------------------------------------------------------------------------------------------------------------------------------------------------------------------------------------------------------------------------------------------------------------------------------------------------------------------------------------------------------------------------------------------------------------------------------------------------------------------------------------------------------------------------------------------------------------------------------------------------------------------------------------------------------------------------------------------------------------------------------------------------------------------|
| 2011 Baseline Scenario                                  | <ul style="list-style-type: none"> <li>- Production, imports, exports, stocks, seed, feed, and non-food uses from FAO Food Balance Sheets (<a href="http://faostat.fao.org/beta/en/#home">http://faostat.fao.org/beta/en/#home</a>).</li> <li>- Production, postharvest, processing, distribution and household waste percentage figures by commodity type from FAO (2011) Global food losses and food waste – Extent, causes and prevention. These factors are provided in Table S3.</li> <li>- Nutritional composition factors based on global average used in FAO Food Balance Sheet Handbook.</li> <li>- 2011 population figures based on UN Population Prospects of 1.2474 billion.</li> <li>- Coefficient variation in caloric, protein and fat of 0.26 based on log-normal distribution from FAO (2014).</li> </ul> |
| 2030 Baseline Scenario                                  | <ul style="list-style-type: none"> <li>- Yield (and food production) stagnates at 2011 levels.</li> <li>- 2030 population figures based on UN Population Prospects of 1.5276 billion.</li> <li>- Coefficient variation in caloric, protein and fat of 0.26 based on log-normal distribution from FAO (2014).</li> </ul>                                                                                                                                                                                                                                                                                                                                                                                                                                                                                                    |
| Scenario 1 (2030): Halving food losses                  | <ul style="list-style-type: none"> <li>- Percentage losses from production, postharvest, processing and distribution were halved their values in baseline scenario.</li> <li>- Yield (and food production) stagnates at 2011 levels.</li> <li>- 2030 population figures based on UN Population Prospects of 1.5276 billion.</li> <li>- Coefficient variation in caloric, protein and fat of 0.26 based on log-normal distribution from FAO (2014).</li> </ul>                                                                                                                                                                                                                                                                                                                                                              |
| Scenario 2 (2030): achieving 50% attainable yields (AY) | <ul style="list-style-type: none"> <li>- Yields for all commodities assumed 50% of their India-specific attainable yield value from Mueller et al. (2012).</li> <li>- Loss and waste percentages assumed the same as in baseline scenario.</li> <li>- 2030 population figures based on UN Population Prospects of 1.5276 billion.</li> <li>- Coefficient variation in caloric, protein and fat of 0.26 based on log-normal distribution from FAO (2014).</li> </ul>                                                                                                                                                                                                                                                                                                                                                        |
| Scenario 3 (2030): achieving 75% attainable yields (AY) | <ul style="list-style-type: none"> <li>- Yields for all commodities assumed 75% of their India-specific attainable yield value from Mueller et al. (2012).</li> <li>- Loss and waste percentages assumed the same as in baseline scenario. These factors are provided in Table S3.</li> <li>- 2030 population figures based on UN Population Prospects of 1.5276 billion.</li> <li>- Coefficient variation in caloric, protein and fat of 0.26 based on log-normal distribution from FAO (2014).</li> </ul>                                                                                                                                                                                                                                                                                                                |
| 2050 Baseline Scenario                                  | <ul style="list-style-type: none"> <li>- Average per capita meat demand increases to 18.3kg and milk to 110 kilograms based on FAO projections (Alexandratos &amp; Bruinsma, 2012). This comprises 3.5kg of bovine meat, 1.2kg mutton &amp; goat meat; 1kg pigmeat; 12.5kg poultry; and 0.8kg other meats). Assumes increased feed demand is met on the basis of increased crop allocation</li> </ul>                                                                                                                                                                                                                                                                                                                                                                                                                      |

|                                                                |                                                                                                                                                                                                                                                                                                                                                                                                                                                                                                                                                                                                                                                                                                                                                                                                                                                                                                                                                                                                                                                                                                                                                                                                           |
|----------------------------------------------------------------|-----------------------------------------------------------------------------------------------------------------------------------------------------------------------------------------------------------------------------------------------------------------------------------------------------------------------------------------------------------------------------------------------------------------------------------------------------------------------------------------------------------------------------------------------------------------------------------------------------------------------------------------------------------------------------------------------------------------------------------------------------------------------------------------------------------------------------------------------------------------------------------------------------------------------------------------------------------------------------------------------------------------------------------------------------------------------------------------------------------------------------------------------------------------------------------------------------------|
|                                                                | <p>rather than pasture in line with livestock-specific protein conversion efficiencies from Herrero et al. (2013).</p> <ul style="list-style-type: none"> <li>- Climatic impacts on yields is assumed based on literature review of impacts in the result of a doubling in pre-industrial CO<sub>2</sub> levels. Yield impacts are summarised in table S4.</li> <li>- 2050 population figures based on UN Population Prospects of 1.62 billion.</li> <li>- Coefficient variation in caloric, protein and fat of 0.26 based on log-normal distribution from FAO (2014).</li> </ul>                                                                                                                                                                                                                                                                                                                                                                                                                                                                                                                                                                                                                         |
| <p>Scenario 1 (2050): Halving food losses</p>                  | <ul style="list-style-type: none"> <li>- Percentage losses from production, postharvest, processing and distribution were halved their values in baseline scenario.</li> <li>- Average per capita meat demand increases to 18.3kg and milk to 110 kilograms based on FAO projections (Alexandratos &amp; Bruinsma, 2012). This comprises 3.5kg of bovine meat, 1.2kg mutton &amp; goat meat; 1kg pigmeat; 12.5kg poultry; and 0.8kg other meats). Assumes increased feed demand is met on the basis of increased crop allocation rather than pasture in line with livestock-specific protein conversion efficiencies from Herrero et al. (2013).</li> <li>- Climatic impacts on yields is assumed based on literature review of impacts in the result of a doubling in pre-industrial CO<sub>2</sub> levels. Yield impacts are summarised in table S4.</li> <li>- 2050 population figures based on UN Population Prospects of 1.62 billion.</li> <li>- Coefficient variation in caloric, protein and fat of 0.26 based on log-normal distribution from FAO (2014).</li> </ul>                                                                                                                             |
| <p>Scenario 2 (2050): achieving 75% attainable yields (AY)</p> | <ul style="list-style-type: none"> <li>- Yields for all commodities assumed 75% of their India-specific attainable yield value from Mueller et al. (2012). These are combined with climatic impacts on yields is assumed based on literature review of impacts in the result of a doubling in pre-industrial CO<sub>2</sub> levels. Yield impacts are summarised in table S4.</li> <li>- Average per capita meat demand increases to 18.3kg and milk to 110 kilograms based on FAO projections (Alexandratos &amp; Bruinsma, 2012). This comprises 3.5kg of bovine meat, 1.2kg mutton &amp; goat meat; 1kg pigmeat; 12.5kg poultry; and 0.8kg other meats). Assumes increased feed demand is met on the basis of increased crop allocation rather than pasture in line with livestock-specific protein conversion efficiencies from Herrero et al. (2013).</li> <li>- Loss and waste percentages assumed the same as in baseline scenario. These factors are provided in Table S3.</li> <li>- 2050 population figures based on UN Population Prospects of 1.62 billion.</li> <li>- Coefficient variation in caloric, protein and fat of 0.26 based on log-normal distribution from FAO (2014).</li> </ul> |
| <p>Scenario 3 (2050): achieving 90% attainable yields (AY)</p> | <ul style="list-style-type: none"> <li>- Yields for all commodities assumed 90% of their India-specific attainable yield value from Mueller et al. (2012). These are combined with climatic impacts on yields is assumed based on literature review of impacts in the result of a doubling in pre-industrial CO<sub>2</sub> levels. Yield impacts are summarised in table S4.</li> <li>- Average per capita meat demand increases to 18.3kg and milk to 110 kilograms based on FAO projections (Alexandratos &amp; Bruinsma, 2012). This comprises 3.5kg of</li> </ul>                                                                                                                                                                                                                                                                                                                                                                                                                                                                                                                                                                                                                                    |

|  |                                                                                                                                                                                                                                                                                                                                                                                                                                                                                                                                                                                                                                                                                |
|--|--------------------------------------------------------------------------------------------------------------------------------------------------------------------------------------------------------------------------------------------------------------------------------------------------------------------------------------------------------------------------------------------------------------------------------------------------------------------------------------------------------------------------------------------------------------------------------------------------------------------------------------------------------------------------------|
|  | <p>bovine meat, 1.2kg mutton &amp; goat meat; 1kg pigmeat; 12.5kg poultry; and 0.8kg other meats). Assumes increased feed demand is met on the basis of increased crop allocation rather than pasture in line with livestock-specific protein conversion efficiencies from Herrero et al. (2013).</p> <ul style="list-style-type: none"><li>- Loss and waste percentages assumed the same as in baseline scenario. These factors are provided in Table S3.</li><li>- 2050 population figures based on UN Population Prospects of 1.62 billion.</li><li>- Coefficient variation in caloric, protein and fat of 0.26 based on log-normal distribution from FAO (2014).</li></ul> |
|--|--------------------------------------------------------------------------------------------------------------------------------------------------------------------------------------------------------------------------------------------------------------------------------------------------------------------------------------------------------------------------------------------------------------------------------------------------------------------------------------------------------------------------------------------------------------------------------------------------------------------------------------------------------------------------------|
