# Supplementary material for: Sustainable food security in India—Domestic production and macronutrient availability
Source: PubMed Central journal article supplement (PMC5865708; doi:10.1371/journal.pone.0193766), 2018-03-23
Supplement: pone.0193766.s004.pdf [file pone.0193766.s004.pdf]

| <b>Crop</b>       | <b>2000 yield<br/>(tha<sup>-1</sup>)</b> | <b>2011 yield<br/>(tha<sup>-1</sup>)</b> | <b>50% AY<br/>(tha<sup>-1</sup>)</b> | <b>Percentage<br/>increase from<br/>2011 to 50%<br/>AY</b> | <b>75% AY<br/>(tha<sup>-1</sup>)</b> | <b>Percentage<br/>increase from<br/>2011 to 75%<br/>AY</b> | <b>90% AY<br/>(tha<sup>-1</sup>)</b> | <b>Percentage<br/>increase from<br/>2011 to 90%<br/>AY</b> |
|-------------------|------------------------------------------|------------------------------------------|--------------------------------------|------------------------------------------------------------|--------------------------------------|------------------------------------------------------------|--------------------------------------|------------------------------------------------------------|
| Barley            | 0.79                                     | 2.35                                     | 2.59                                 | 10%                                                        | 3.88                                 | 65%                                                        | 4.66                                 | 97.6%                                                      |
| Cassava           | 25.63                                    | 36.48                                    | 27.08                                | 0%                                                         | 28.89                                | 0%                                                         | 30.46                                | 0.0%                                                       |
| Groundnut         | 0.97                                     | 1.31                                     | 1.02                                 | 0%                                                         | 1.18                                 | 0%                                                         | 1.32                                 | 0.7%                                                       |
| Maize             | 1.54                                     | 2.48                                     | 1.97                                 | 0%                                                         | 2.64                                 | 7%                                                         | 3.11                                 | 25.5%                                                      |
| Millet            | 0.79                                     | 1.19                                     | 0.88                                 | 0%                                                         | 1.06                                 | 0%                                                         | 1.2                                  | 1.2%                                                       |
| Potato            | 18.41                                    | 22.72                                    | 18.85                                | 0%                                                         | 20.35                                | 0%                                                         | 21.46                                | 0.00%                                                      |
| Rapeseed          | 0.94                                     | 1.26                                     | 0.98                                 | 0%                                                         | 1.08                                 | 0%                                                         | 1.19                                 | 0.00%                                                      |
| Rice              | 2.95                                     | 3.59                                     | 3.19                                 | 0%                                                         | 3.82                                 | 6%                                                         | 4.33                                 | 20.7%                                                      |
| Rye               | 1.72                                     | 1.72                                     | 1.78                                 | 3%                                                         | 2.39                                 | 39%                                                        | 2.87                                 | 66.9%                                                      |
| Sorghum           | 0.78                                     | 0.95                                     | 0.94                                 | 0%                                                         | 1.19                                 | 25%                                                        | 1.39                                 | 46.5%                                                      |
| Soybean           | 0.93                                     | 1.20                                     | 1.06                                 | 0%                                                         | 1.41                                 | 18%                                                        | 1.67                                 | 39.2%                                                      |
| Sugarbeet         | 36.18                                    | 36.18                                    | 38.07                                | 5%                                                         | 48.43                                | 34%                                                        | 57.48                                | 58.9%                                                      |
| Sugarcane         | 66.53                                    | 69.25                                    | 69.68                                | 1%                                                         | 76.29                                | 10%                                                        | 85.82                                | 23.9%                                                      |
| Sunflower<br>Seed | 0.49                                     | 0.71                                     | 0.69                                 | 0%                                                         | 0.96                                 | 36%                                                        | 1.13                                 | 59.6%                                                      |
| Wheat             | 2.76                                     | 2.99                                     | 3.08                                 | 3%                                                         | 3.63                                 | 21%                                                        | 4.07                                 | 36.2%                                                      |
