# Supplementary material for: Sustainable food security in India—Domestic production and macronutrient availability
Source: PubMed Central journal article supplement (PMC5865708; doi:10.1371/journal.pone.0193766), 2018-03-23
Supplement: pone.0193766.s005.pdf [file pone.0193766.s005.pdf]

| <b>Crop</b>    | <b>Estimated impact of<br/>climate change on yield in<br/>2050</b> |
|----------------|--------------------------------------------------------------------|
| Rice           | -7.4%                                                              |
| Wheat          | -12.0%                                                             |
| Coarse Cereals | -12.0%                                                             |
| Sorghum        | -12.0%                                                             |
| Millet         | -4.3%                                                              |
| Maize          | -2.5%                                                              |
| Pulses         | -12.0%                                                             |
| Chickpeas      | -12.0%                                                             |
| Peas           | -12.0%                                                             |
| Lentils        | -12.0%                                                             |
| Oilseeds       | 0.5%                                                               |
| Groundnuts     | -23.0%                                                             |
| Soybean        | -18%                                                               |
| Sugarcane      | -10%                                                               |
| Potato         | -22%                                                               |
